# Supplementary material
Source: MDPI journal article supplement (https://www.mdpi.com/2306-5710/7/3/68)
Supplement: s1 [file s1]

Supplementary Materials

# Brewing Efficacy of Non-Conventional *Saccharomyces Non-cerevisiae* Yeasts

James Bruner <sup>1,2</sup>, Andrew Marcus <sup>1</sup> and Glen Fox <sup>1,\*</sup>

<sup>1</sup> Food Science and Technology Department, University of California, 1 Shields Ave, Davis, CA 95616, USA; jbruner@ucdavis.edu (J.B.); anmarcus@ucdavis.edu (A.M.)

<sup>2</sup> Creature Comforts Brewing Company, 1124 San Julian St, Los Angeles, CA 90015, USA

\* Correspondence: gpfox@ucdavis.edu

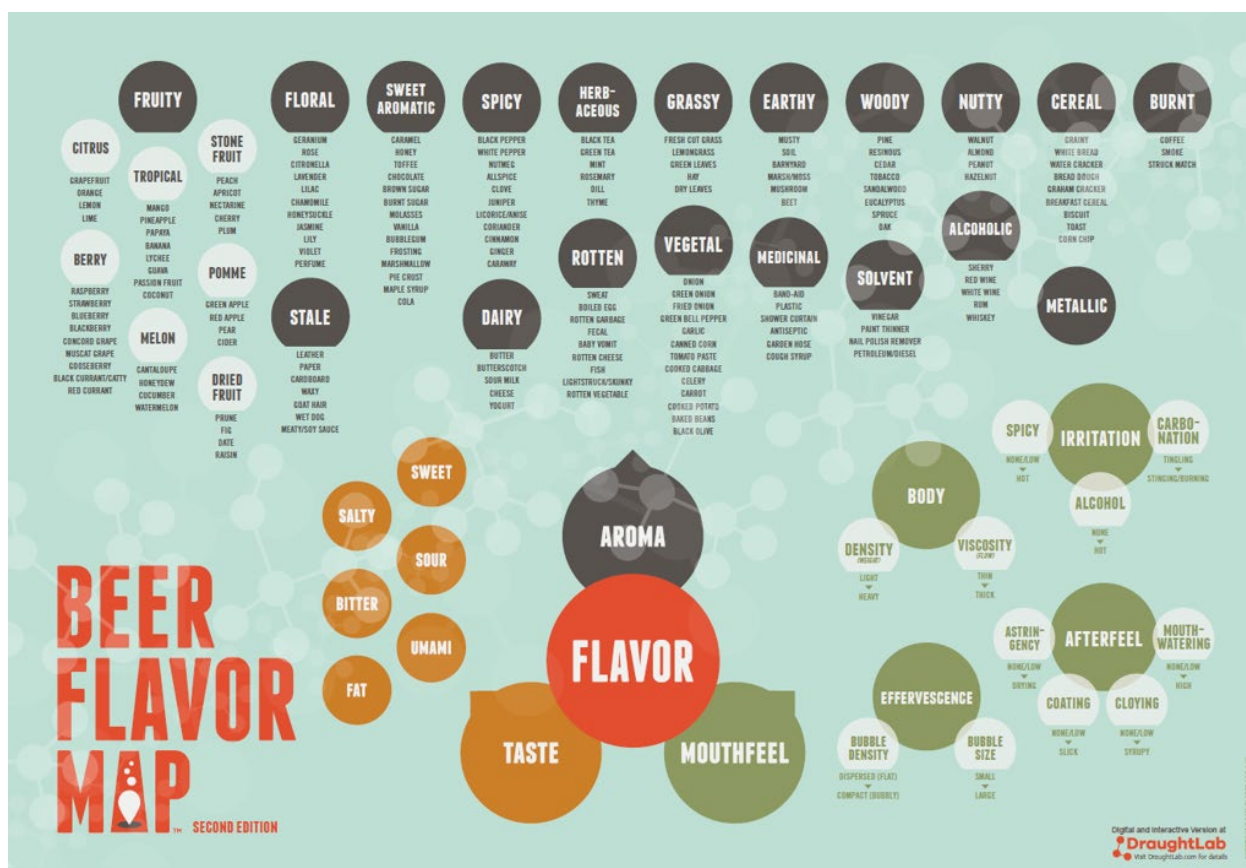

**Figure S1.** Beer Flavor Map©, as provided by DraughtLab, that outlines the flavor descriptors common to beer and was used to determine terms for consensus method and subsequent descriptive analysis.

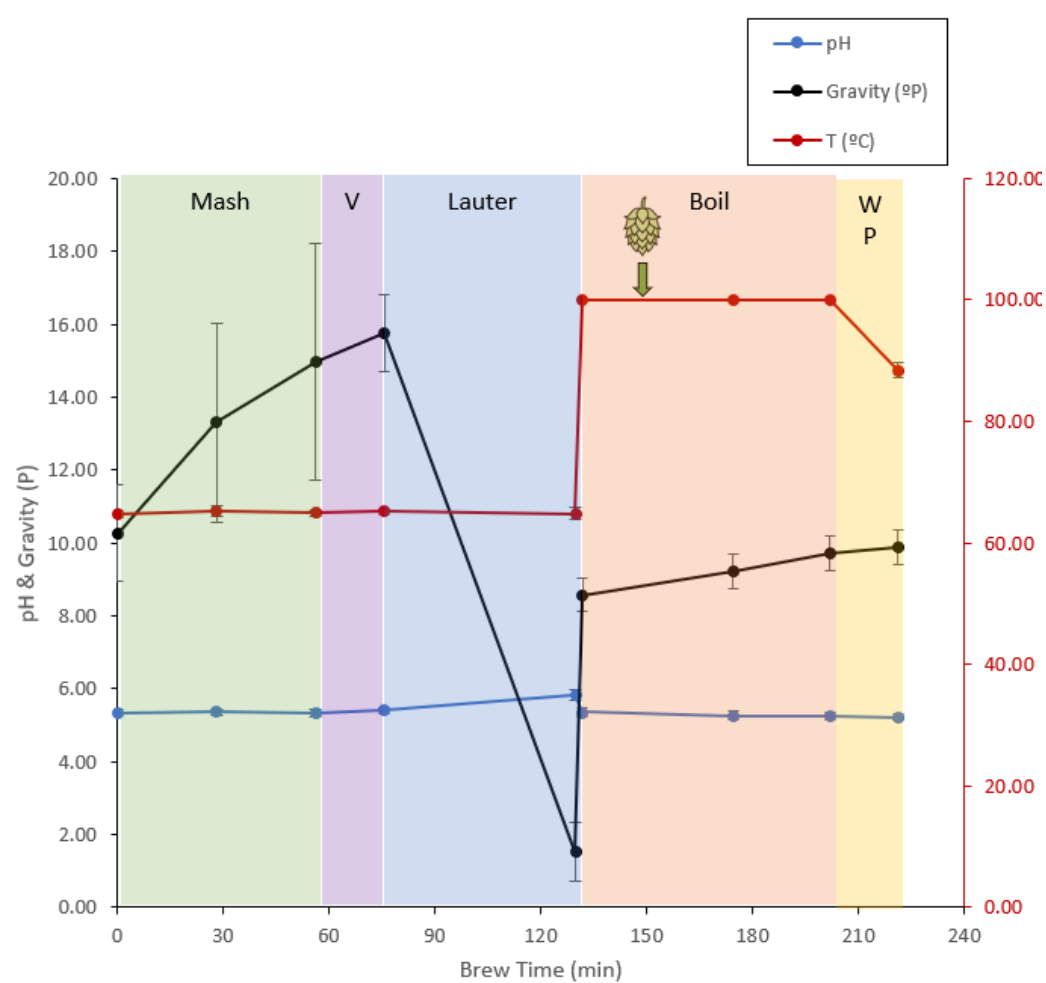

**Figure S2.** Average of standard brew day analytical parameters, with error bars representing standard deviation.
